# Supplementary material for: Nursing home nurses’ experiences of psychological resilience development in dementia care: A qualitative descriptive study
Source: Research Square preprint supplement (doi:10.21203/rs.3.rs-8543600/v1), 2026-02-06
Supplement: Supplementary file 1 [file ff43356fd479803e58a59d50.xlsx]

## Sheet: COREQ Checklist
COREQ (Consolidated Criteria for Reporting Qualitative Research) Checklist
Additional File 1: Nursing home nurses' experiences of psychological resilience development in dementia care
No.	Topic	Item	Reported on Page/Section	Comment
Domain 1: Research team and reflexivity
Personal characteristics
1	Interviewer/facilitator	Which author(s) conducted the interview or focus group?	Methods, Data collection	Two researchers: doctoral nursing student (primary) and master's-level research assistant (secondary)
2	Credentials	What were the researcher's credentials?	Methods, Data collection	PhD candidate in nursing; Master's degree in nursing
3	Occupation	What was their occupation at the time of the study?	Methods, Data collection	Doctoral student with 5 years geriatric care experience; Research assistant with 3 years qualitative research experience
4	Gender	Was the researcher male or female?	Not explicitly stated	Can be added upon request
5	Experience and training	What experience or training did the researcher have?	Methods, Data collection	Extensive qualitative research training; reflexive journals maintained
Relationship with participants
6	Relationship established	Was a relationship established prior to study commencement?	Methods, Data collection	No prior relationships with participants
7	Participant knowledge of the interviewer	What did the participants know about the researcher?	Methods, Data collection	Informed during consent process about research purpose
8	Interviewer characteristics	What characteristics were reported about the interviewer?	Methods, Data collection	Clinical experience in geriatric settings; qualitative research experience
Domain 2: Study design
Theoretical framework
9	Methodological orientation	What methodological orientation was stated?	Methods, Design	Qualitative descriptive study informed by IPA principles; QUAGOL analysis; TLT theoretical framework
Participant selection
10	Sampling	How were participants selected?	Methods, Sampling	Maximum variation sampling across gender, age, education, experience, institution type
11	Method of approach	How were participants approached?	Methods, Setting	Through participating nursing homes in Guangzhou and Jinan
12	Sample size	How many participants were in the study?	Results, Participant characteristics	24 nurses
13	Non-participation	How many people refused or dropped out?	Not reported	Can be added if data available
Setting
14	Setting of data collection	Where was the data collected?	Methods, Interview procedures	Private meeting rooms at nursing homes
15	Presence of non-participants	Was anyone else present besides the participant and researcher?	Methods, Interview procedures	Not explicitly stated; implied private one-on-one interviews
16	Description of sample	What are the important characteristics of the sample?	Results, Table 2	Demographics, education, experience, training status detailed in Table 2
Data collection
17	Interview guide	Were questions, prompts or guides provided?	Methods, Table 1	Semi-structured interview guide with main and probe questions provided
18	Repeat interviews	Were repeat interviews carried out?	Methods	No; single interviews with member checking
19	Audio/visual recording	Did the research use audio or visual recording?	Methods, Interview procedures	Audio-recorded with written consent
20	Field notes	Were field notes made during and/or after the interview?	Methods, Data collection	Reflexive journals maintained; 3-month on-site observation at each site
21	Duration	What was the duration of the interviews?	Results, Participant characteristics	45-90 minutes (mean 62.8±12.4)
22	Data saturation	Was data saturation discussed?	Methods, Sampling; Methods, Interview procedures	Saturation reached at 21st interview; 3 additional interviews confirmed
23	Transcripts returned	Were transcripts returned to participants?	Methods, Rigour	Findings returned to 5 participants for member checking
Domain 3: Analysis and findings
Data analysis
24	Number of data coders	How many data coders coded the data?	Methods, Data analysis	Four researchers independently read transcripts; primary researcher coded with NVivo 12.0
25	Description of coding tree	Did authors provide a description of the coding tree?	Results, Table 3; Figure 1	Three themes, nine subthemes presented with TLT correspondence
26	Derivation of themes	Were themes identified in advance or derived from data?	Methods, Data analysis	Informed by TLT phases while remaining open to inductively emerging themes
27	Software	What software was used to manage the data?	Methods, Data analysis	NVivo 12.0
28	Participant checking	Did participants provide feedback on the findings?	Methods, Rigour	Member checking with 5 participants; peer debriefing with 5 experienced nurses
Reporting
29	Quotations presented	Were participant quotations presented?	Results	Extensive quotations throughout Results section with participant identifiers
30	Data and findings consistent	Was there consistency between data presented and findings?	Results; Discussion	Themes supported by multiple participant quotations
31	Clarity of major themes	Were major themes clearly presented in findings?	Results; Figure 1; Table 3	Three phases clearly described with conceptual model
32	Clarity of minor themes	Is there a description of diverse cases or discussion of minor themes?	Results; Discussion, Methodological considerations	Variation in resilience development discussed; limitations acknowledged
